# Supplementary material
Source: Springer Nature journal article supplement (https://www.springermedizin.de/resource/supplementary/12889_2009_1867_MOESM3_ESM.pdf/9504240)
Supplement: MOESM3 [file 9504240]

A1 malignant neoplasms

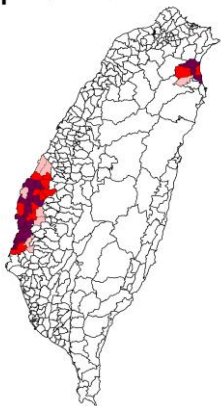

A2 malignant neoplasms

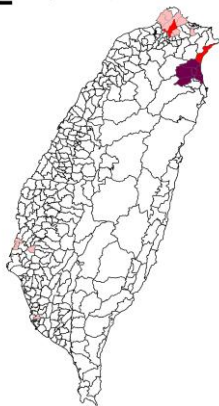

B1 cerebrovascular disease

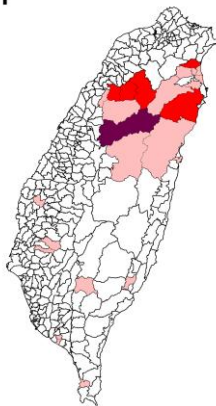

B2 cerebrovascular disease

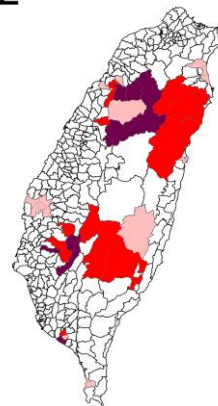

C1 heart disease

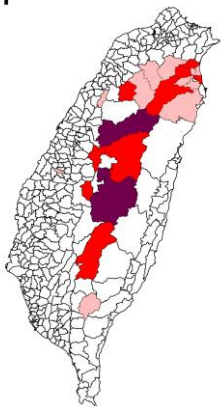

C2 heart disease

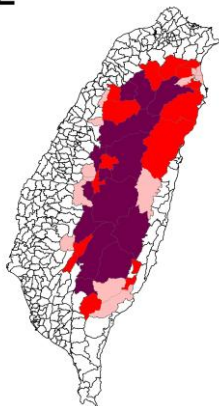

D1 diabetes mellitus

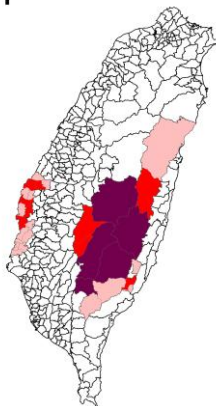

D2 diabetes mellitus

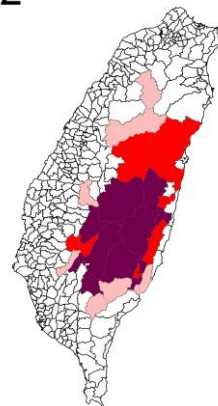

E1 accidents and adverse effects

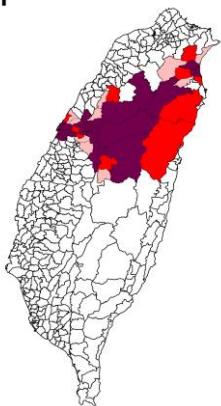

E2 accidents and adverse effects

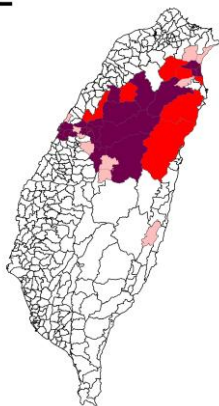

F1 pneumonia

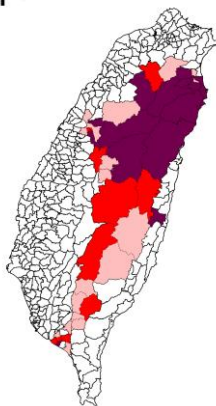

F2 pneumonia

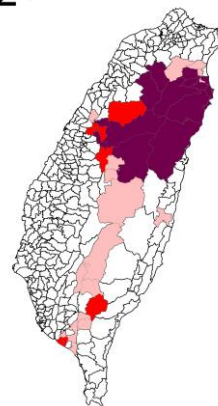

# Legend

**Gi\*:** Z scores

 +1.96 to +2.58

 + 2.58 to +3.31

 > +3.31
